# Supplementary material for: DNAJA1‑knockout alleviates heat stroke‑induced endothelial barrier disruption via improving thermal tolerance and suppressing the MLCK‑MLC signaling pathway
Source: PubMed Central journal article supplement — Mol Med Rep. 2024 Mar 26;29(5):87. doi: 10.3892/mmr.2024.13211 (PMC10995657; doi:10.3892/mmr.2024.13211), 2024-03-26

Figure S1. Genome-wide CRISPR-Cas9 screen research to explore specific heat-tolerance genes and the key KEGG pathways obtained by enrichment analysis. (A) Specific experimental procedures and methods of genome-wide CRISPR-Cas9 screen research. (B) Calcium signaling pathway and associated proteins framed in blue were found to have significant differences. (C) Vascular smooth muscle contraction and associated proteins framed in blue were found to have significant differences. (D) Network pathways of actin cytoskeleton regulation and associated proteins framed in blue were found to have significant differences. (E) Network pathways of complement and coagulation cascades and associated proteins framed in red were found to have significant differences. (F) The genotype of all purchased KO mice was confirmed by PCR analysis. KEGG, Kyoto Encyclopedia of Genes and Genomes; KO, knockout; HUVECs, human umbilical vein endothelial cells; CON, control.

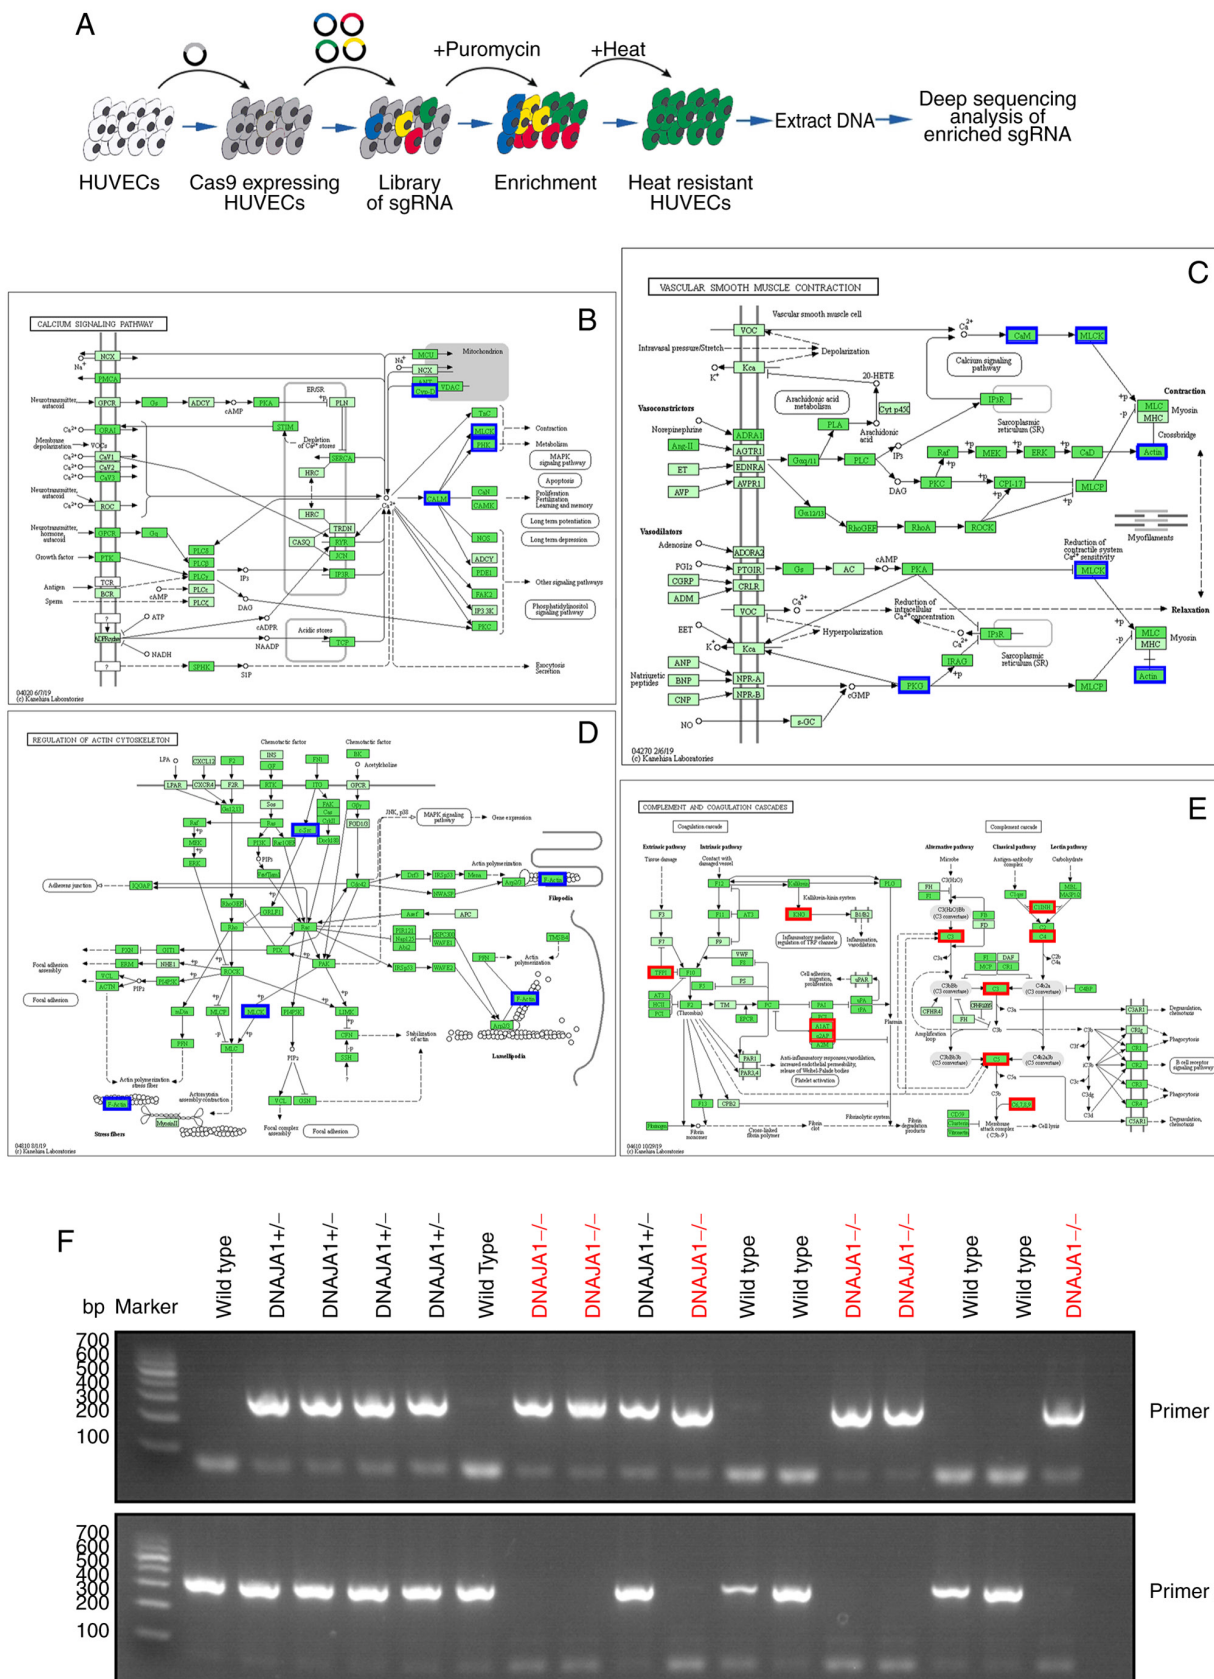

Supplement: Supplementary_Data.pdf [file Supplementary_Data.pdf]
